# Supplementary material for: Genetic Variants of Glucose-6-Phosphate Dehydrogenase and Their Associated Enzyme Activity: A Systematic Review and Meta-Analysis
Source: MDPI journal article supplement (doi:10.3390/pathogens11091045), 2022-09-14
Supplement: s1 [file s1]

## **Supplementary File S1: Literature search protocols**

### **Search terms:**

(G6PD OR Glucose-6-Phosphate Dehydrogenase OR “Glucose 6 Phosphate Dehydrogenase”) AND  
(spectrophotometry OR quant\* OR Activity) AND (genotype OR geno\* OR variant)

### **Inclusion and exclusion criteria:**

#### Study Criteria

##### *Inclusion:*

- Able to provide individual-level data for phenotype and genotype
- Used one of the following quantitative spectrophotometry assays: Trinity, Randox, Pointe Scientific
- Performed G6PD genotyping (either full sequencing or SNP-typing)

##### *Exclusion:*

- Studies published before 1983
- Studies with <30 males
- Studies published in a language other than English

#### Participant Criteria:

##### *Inclusion:*

- All ages
- Males and females
- Malaria positive and malaria negative

##### *Exclusion:*

- Blood transfusion in the last 4 months (if known) –
- Any other event that, may have caused considerable blood loss (injury, birth, if known...)
- Other known haematological conditions (e.g. thalassemia, sickle cell ...)

## **Data variables collected**

### Essential:

- Phenotypic method
- Molecular method
- Phenotypic G6PD result
- G6PD variant
- Hb
- Sex
- Malaria status in malaria endemic areas
- Age

### Desirable:

- Multiple measurements that contributed to the final phenotypic G6PD result
- Body temp
- History of febrile disease in the last 6 months (malaria, dengue etc)
- History of blood transfusion in the last 6 months
- History of injury & pregnancy/birth
