# Supplementary material for: Genetic Variants of Glucose-6-Phosphate Dehydrogenase and Their Associated Enzyme Activity: A Systematic Review and Meta-Analysis
Source: MDPI journal article supplement (doi:10.3390/pathogens11091045), 2022-09-14
Supplement: s1 [file s1]

## Supplementary File S2: Modified QUADAS tool

### Domain 1: Patient selection

#### A. Risk of bias

Describe methods of patient selection:

- Was a consecutive or random sample of patients enrolled? Yes/No/Unclear

- Did the study avoid inappropriate exclusions? Yes/No/Unclear

Could the selection of patients have introduced bias? RISK: LOW/HIGH/UNCLEAR

#### B. Concerns regarding applicability

Describe criteria for genotyping

Is there concern that the included patients do not match the review question? CONCERN:  
LOW/HIGH/UNCLEAR

### Domain 2: DETERMINING GENOTYPE *(if more than 1 index test was used, please complete for each test)*

#### A. Risk of bias

Describe how genotype was identified

- Was genotype determined without knowledge of G6PD activity? Yes/No/Unclear

Could the conduct or interpretation of the index test have introduced bias? RISK: LOW/HIGH/UNCLEAR

### Domain 3: DETERMINING PHENOTYPE

#### A. Risk of bias

Describe the reference standard and how it was conducted and interpreted:

|                                                                                                                                                          |                        |
|----------------------------------------------------------------------------------------------------------------------------------------------------------|------------------------|
| <ul style="list-style-type: none"> <li>Is the reference standard likely to correctly classify the target condition?</li> </ul>                           | Yes/No/Unclear         |
| <ul style="list-style-type: none"> <li>Were the reference standard results interpreted without knowledge of the results of the index test?</li> </ul>    | Yes/No/Unclear         |
| Could the reference standard, its conduct, or its interpretation have introduced bias?                                                                   | RISK: LOW/HIGH/UNCLEAR |
| <b>Domain 4: Flow and timing</b>                                                                                                                         |                        |
| <b>A. Risk of bias</b>                                                                                                                                   |                        |
| <ul style="list-style-type: none"> <li>Was there an appropriate interval between sample collection and spectrophotometry (&lt;7 days at 4°C)?</li> </ul> | Yes/No/Unclear         |
| <ul style="list-style-type: none"> <li>Did patients receive the same variant determination and spectrophotometry?</li> </ul>                             | Yes/No/Unclear         |
| <ul style="list-style-type: none"> <li>Were all patients included in the analysis?</li> </ul>                                                            | Yes/No/Unclear         |
| Could the patient flow have introduced bias?                                                                                                             | RISK: LOW/HIGH/UNCLEAR |
