# Supplementary material for: Genetic Variants of Glucose-6-Phosphate Dehydrogenase and Their Associated Enzyme Activity: A Systematic Review and Meta-Analysis
Source: MDPI journal article supplement (doi:10.3390/pathogens11091045), 2022-09-14
Supplement: s1 [file s1]

Supplementary File S3: QUADAS Results

Domain 1: Patient Selection

| Study                          | Recruitment                                                                            | Enrolment<br>consecutive<br>/random? | Exclusions<br>avoided? | Did selection<br>introduce bias? | Criteria for genotyping                                                                                                                                                                                                                                                                                 | Risk of bias<br>from patients<br>matching review<br>Q? |
|--------------------------------|----------------------------------------------------------------------------------------|--------------------------------------|------------------------|----------------------------------|---------------------------------------------------------------------------------------------------------------------------------------------------------------------------------------------------------------------------------------------------------------------------------------------------------|--------------------------------------------------------|
| <b>Bancone_et_al_2015 (27)</b> | Purposive selection of known G6PD phenotype or genotype                                | no                                   | yes                    | high                             | All participants                                                                                                                                                                                                                                                                                        | low                                                    |
| <b>Bancone_et_al_2016 (28)</b> | Exhaustive cross-sectional surveys                                                     | yes                                  | yes                    | low                              | Phenotypically deficient males, all females                                                                                                                                                                                                                                                             | low                                                    |
| <b>Bancone_et_al_2017 (29)</b> | Health-facility based recruitment, pregnant women attending antenatal care             | yes                                  | yes                    | low                              | Genotyping for Mahidol was performed on all included women, while Chinese-4, Kaiping, Canton and Mediterranean variants were analysed only on women with either enzymatic activity below 80% of normal in Mahidol-wild type genotype or enzymatic activity below 30% and Mahidol-heterozygous genotype. | unclear                                                |
| <b>Brito_et_al_2016 (30)</b>   | Consecutive males, malaria patients from clinic, non-malaria from clinic and community | yes                                  | no                     | high                             | Only genotyped those with G6PD <70%, 100% based on a mean of males, not median                                                                                                                                                                                                                          | low                                                    |
| <b>Deng_et_al_2017 (31)</b>    | Unclear, 100 unrelated individuals fitting inclusion criteria were enrolled            | no                                   | unclear                | high                             | All phenotypically deficient participants genotyped                                                                                                                                                                                                                                                     | low                                                    |

|                                |                                                                                                                                                                                                                             |         |         |         |                                                                                         |     |
|--------------------------------|-----------------------------------------------------------------------------------------------------------------------------------------------------------------------------------------------------------------------------|---------|---------|---------|-----------------------------------------------------------------------------------------|-----|
| <b>Johnson_et_al_2009 (32)</b> | random selection post census, only children 1-10 yrs, all participants genotyped, some standardized exclusion criteria                                                                                                      | yes     | no      | low     | 110 randomly selected individuals tested for A-                                         | low |
| <b>Kim_et_al_2011 (33)</b>     | Cross sectional survey, two stage cluster sampling, 1 child / household                                                                                                                                                     | unclear | unclear | unclear | All phenotypically deficient participants genotyped (<4.5U/gHb)                         | low |
| <b>La_Rue_et_al_2014 (34)</b>  | Blood samples from African-American blood donors                                                                                                                                                                            | no      | no      | high    | Genotyping selection not specified, but state it was biased towards lower G6PD activity | low |
| <b>Ley_et_al_2021 (35)</b>     | Composite data from three studies: clinical trial of malaria patients, cross-sectional survey, case-control study                                                                                                           | yes     | yes     | low     | all individuals <70% AMM and a sample subsample above 70%                               | low |
| <b>Pal_et_al_2021 (36)</b>     | Composite data from multiple studies: 3 diagnostic accuracy studies in USA, focusing on African-Americans in recruitment. 1 study in UK -requested testing already completed at Hammersmith Hospital Haematology laboratory | no      | no      | high    | limited number', 'covering the critical G6PD activity dynamic range'                    | low |
| <b>Reading_et_al_2016 (37)</b> | Patients presenting with AHA + health controls, patients followed up 4+ months following AHA.                                                                                                                               | yes     | yes     | low     | All AHA patients and all healthy controls                                               | low |

|                                     |                                                                                                         |         |     |         |                                                                                                        |     |
|-------------------------------------|---------------------------------------------------------------------------------------------------------|---------|-----|---------|--------------------------------------------------------------------------------------------------------|-----|
| <b>Roca-Feltrer_et_al_2014 (38)</b> | Patients enrolled based on pre-defined eligibility criteria, how patients were identified is unclear    | unclear | no  | high    | All individuals with <60% of AMM                                                                       | low |
| <b>Roh_et_al_2016 (39)</b>          | Cross sectional survey, two stage cluster sampling, 1 child / household                                 | yes     | no  | low     | 625 / 631 genotyped                                                                                    | low |
| <b>Satyagraha_et_al_2015 (40)</b>   | Cross-sectional surveys, villages in proximity to health centres, all residents invited to participate. | yes     | yes | low     | all G6PD deficient + convenience sample of G6PD normal. 80/104 agreed for genotyping.                  | low |
| <b>Satyagraha_et_al_2016 (41)</b>   | Random selection of all residents of one village.                                                       | yes     | yes | low     | all G6PD deficient + those with low HB (<8g/dL)                                                        | low |
| <b>Satyagraha_et_al_2021 (42)</b>   | Cross-sectional surveys, females >6yrs                                                                  | unclear | yes | low     | all individuals <80% normal activity                                                                   | low |
| <b>Xia_et_al_2016 (43)</b>          | Hospital-based sampling, method comparison study                                                        | unclear | yes | unclear | G6PD deficient by novel assay and/or G6PD/6PGD ratio + 80 randomly selected G6PD normal (40 each sex). | low |

## Domain 2: Genotype

| Study                          | How was genotyping done?                                        | Was genotyping done without knowing spec results? | Could genotyping have introduced bias? |
|--------------------------------|-----------------------------------------------------------------|---------------------------------------------------|----------------------------------------|
| <b>Bancone_et_al_2015 (27)</b> | Sequencing                                                      | no                                                | high                                   |
| <b>Bancone_et_al_2016 (28)</b> | PCR-RFLP for Mahidol, Chinese-4, Canton, Viangchan              | no                                                | high                                   |
| <b>Bancone_et_al_2017 (29)</b> | PCR-RFLP for Mahidol, Chinese-4, Kaiping, Mediterranean, Canton | no                                                | high                                   |
| <b>Brito_et_al_2016 (30)</b>   | PCR-RFLP for A-, Chatham, Mediterranean, Aures                  | no                                                | high                                   |
| <b>Deng_et_al_2017 (31)</b>    | SNaPshot assay                                                  | no                                                | high                                   |
| <b>Johnson_et_al_2009 (32)</b> | Genotyping for 3 A- variants                                    | unclear                                           | unclear                                |
| <b>Kim_et_al_2011 (33)</b>     | Sequencing                                                      | no                                                | high                                   |

|                              |                                                                                                      |         |         |
|------------------------------|------------------------------------------------------------------------------------------------------|---------|---------|
| La_Rue_et_al_2014 (34)       | Sequencing                                                                                           | no      | high    |
| Ley_et_al_2021 (35)          | PCR-RFLP for Mahidol, Viangchan, Mediterranean, Orissa, Kalyan-Kerala                                | no      | high    |
| Pal_et_al_2021 (36)          | Sequencing                                                                                           | no      | high    |
| Reading_et_al_2016 (37)      | SNaPshot assay                                                                                       | yes     | low     |
| Roca-Feltrer_et_al_2014 (38) | Sequencing                                                                                           | no      | high    |
| Roh_et_al_2016 (39)          | PCR-RFLP for A-                                                                                      | unclear | unclear |
| Satyagraha_et_al_2015 (40)   | Sequencing                                                                                           | no      | high    |
| Satyagraha_et_al_2016 (41)   | PCR-RFLP for Vanua Lava, Chatham, Viangchan and Kaiping                                              | no      | high    |
| Satyagraha_et_al_2021 (42)   | PCR-RFLP for Vanua Lava, Chatham, Viangchan, Coimbra, Kaiping + sequencing for indeterminate results | no      | high    |
| Xia_et_al_2016 (43)          | Multicolour melting curve analysis                                                                   | no      | high    |

### Domain 3: Phenotype

| Study                   | How was spec done?                                        | Were replicate measures used? | Were control samples used regularly? | Was reaction temperature addressed? | Risk of bias due to spec. assay and/or procedures? | Was malaria status considered when defining deficiency? | Was spec done without knowing genotype? | Was '100% activity' defined based on study's own data? | Risk of bias due to spec methods and/or interpretation? |
|-------------------------|-----------------------------------------------------------|-------------------------------|--------------------------------------|-------------------------------------|----------------------------------------------------|---------------------------------------------------------|-----------------------------------------|--------------------------------------------------------|---------------------------------------------------------|
| Bancone_et_al_2015 (27) | Duplicate testing using trinity, AMM from 26 normal males | yes                           | yes                                  | yes                                 | low                                                | yes                                                     | yes                                     | yes                                                    | low                                                     |

|                                |                                                                                                                                 |     |     |     |      |     |         |         |      |
|--------------------------------|---------------------------------------------------------------------------------------------------------------------------------|-----|-----|-----|------|-----|---------|---------|------|
| <b>Bancone_et_al_2016 (28)</b> | Trinity, unclear if replicates used. Previously established AMM of 7.51 U/gHb used                                              | yes | yes | yes | low  | no  | yes     | yes     | low  |
| <b>Bancone_et_al_2017 (29)</b> | WHO method on WBC depleted samples done in triplicates. As only pregnant women, 'female population median' was used, 11.5U/g Hb | yes | yes | yes | low  | no  | yes     | yes     | high |
| <b>Brito_et_al_2016 (30)</b>   | Pointe Scientific                                                                                                               | yes | yes | yes | low  | yes | yes     | yes     | low  |
| <b>Deng_et_al_2017 (31)</b>    | Single testing with Trinity, deficiency defined as <4.5U/gHb                                                                    | no  | yes | yes | high | no  | yes     | unclear | high |
| <b>Johnson_et_al_2009 (32)</b> | Single testing with Randox, time to testing not mentioned, deficiency defined from Randox recommendation                        | no  | yes | yes | high | no  | unclear | no      | high |
| <b>Kim_et_al_2011 (33)</b>     | Single testing with Trinity, deficiency defined as <4.5U/gHb, 100% is a mean, not an AMM                                        | no  | yes | yes | high | no  | yes     | yes     | high |
| <b>La_Rue_et_al_2014 (34)</b>  | Trinity, AMM of 7.18                                                                                                            | yes | yes | yes | low  |     | yes     | yes     | low  |
| <b>Ley_et_al_2021 (35)</b>     | Randox + Pointe Scientific                                                                                                      | yes | yes | yes | low  | yes | yes     | yes     | low  |

|                                     |                                                                                    |         |     |     |         |     |         |         |         |
|-------------------------------------|------------------------------------------------------------------------------------|---------|-----|-----|---------|-----|---------|---------|---------|
| <b>Pal_et_al_2021 (36)</b>          | Pointe Scientific                                                                  | no      | yes | yes | high    |     | yes     | unclear | unclear |
| <b>Reading_et_al_2016 (37)</b>      | Randox                                                                             | no      | yes | yes | low     | no  | yes     | no      | low     |
| <b>Roca-Feltrer_et_al_2014 (38)</b> | Single testing with Trinity, deficiency defined as <60%                            | no      | yes | yes | high    | no  | yes     | yes     | high    |
| <b>Roh_et_al_2016 (39)</b>          | Single testing with Trinity done within 24 hours, deficiency defined as 60% of AMM | no      | yes | yes | high    | no  | unclear | yes     | high    |
| <b>Satyagraha_et_al_2015 (40)</b>   | Trinity                                                                            | no      | yes | yes | high    | no  | yes     | no      | high    |
| <b>Satyagraha_et_al_2016 (41)</b>   | Trinity, in triplicate                                                             | yes     | yes | yes | low     | no  | yes     | no      | high    |
| <b>Satyagraha_et_al_2021 (42)</b>   | Trinity                                                                            | no      | yes | yes | high    | yes | yes     | no      | high    |
| <b>Xia_et_al_2016 (43)</b>          | Zhongshan Biotech G6PD/6PGD ratio                                                  | unclear | yes | yes | unclear | no  | yes     | unclear | unclear |

#### Domain 4: Flow and timing

| <b>Study</b>                   | <b>Was spec done within 7d (sample at 4°C)?</b> | <b>Did all patients receive the same testing?</b> | <b>Were all patients included in analysis?</b> | <b>Could patient flow have introduced bias?</b> |
|--------------------------------|-------------------------------------------------|---------------------------------------------------|------------------------------------------------|-------------------------------------------------|
| <b>Bancone_et_al_2015 (27)</b> | yes                                             | yes                                               | yes                                            | low                                             |
| <b>Bancone_et_al_2016 (28)</b> | yes                                             | yes                                               | no                                             | low                                             |

|                                     |         |     |     |      |
|-------------------------------------|---------|-----|-----|------|
| <b>Bancone_et_al_2017 (29)</b>      | yes     | yes | yes | low  |
| <b>Brito_et_al_2016 (30)</b>        | yes     | yes | yes | high |
| <b>Deng_et_al_2017 (31)</b>         | unclear | yes | no  | high |
| <b>Johnson_et_al_2009 (32)</b>      | unclear | yes | no  | low  |
| <b>Kim_et_al_2011 (33)</b>          | yes     | yes | no  | high |
| <b>La_Rue_et_al_2014 (34)</b>       | yes     | yes | yes | low  |
| <b>Ley_et_al_2021 (35)</b>          | yes     | no  | yes | high |
| <b>Pal_et_al_2021 (36)</b>          | yes     | yes | yes | high |
| <b>Reading_et_al_2016 (37)</b>      | unclear | no  | no  | high |
| <b>Roca-Feltrer_et_al_2014 (38)</b> | yes     | yes | no  | high |
| <b>Roh_et_al_2016 (39)</b>          | yes     | yes | no  | low  |
| <b>Satyagraha_et_al_2015 (40)</b>   | yes     | yes | no  | high |
| <b>Satyagraha_et_al_2016 (41)</b>   | yes     | yes | no  | high |
| <b>Satyagraha_et_al_2021 (42)</b>   | yes     | yes | no  | high |
| <b>Xia_et_al_2016 (43)</b>          | yes     | yes | no  | high |
