# Supplementary material for: Genetic Variants of Glucose-6-Phosphate Dehydrogenase and Their Associated Enzyme Activity: A Systematic Review and Meta-Analysis
Source: MDPI journal article supplement (doi:10.3390/pathogens11091045), 2022-09-14
Supplement: s1 [file s1]

Table S1: Characteristics of Included Studies

| Study                        | Country       | Study format                                     | Sample Size | Number genotyped | Spectro. assay     | Genotyping method | AMM (U/g Hb)     | Sex (% Male*) | Age in years (mean (range)) | Malaria (% Positive*) |
|------------------------------|---------------|--------------------------------------------------|-------------|------------------|--------------------|-------------------|------------------|---------------|-----------------------------|-----------------------|
| Bancone_et_al_2015 (27)      | Thailand      | Purposive, assay evaluation                      | 150         | 150              | Trinity            | Sequencing        | 7.5              | 34.0          | 30.6 (18.0 – 58.0)          | -                     |
| Bancone_et_al_2016 (28)      | Myanmar       | Clinical trial                                   | 819         | 110              | Trinity            | PCR               | 7.5              | 36.5          | -                           | 0                     |
| Bancone_et_al_2017 (29)      | Thailand      | Routine, health-facility based                   | 13,520      | 521              | WHO (WBC depleted) | PCR               | 11.8             | 0.0           | 26.7 (14.0 – 45.0)          | -                     |
| Brito_et_al_2016 (30)        | Brazil        | Cross-sectional, assay evaluation                | 674         | 101              | Pointe Scientific  | PCR               | 6.6              | 100.0         | -                           | 72.0                  |
| Deng_et_al_2017 (31)         | Myanmar       | Cross-sectional, prevalence                      | 100         | 100              | Trinity            | PCR               | 5.7              | 53.0          | 31.3 (4.0 – 75.0)           | 0.0                   |
| Johnson_et_al_2009 (32)      | Uganda        | Cross-sectional, assay comparison                | 601         | 600              | Randox             | PCR               | 205 <sup>a</sup> | 51.8          | -                           | 20.0                  |
| Kim_et_al_2011 (33)          | Cambodia      | Cross-sectional, assay evaluation                | 903         | 155              | Trinity            | Sequencing        | 12.6             | 50.3          | 25.0 (2.0 – 70.0)           | -                     |
| La_Rue_et_al_2014 (34)       | United States | Cross-sectional, assay evaluation                | 214         | 110              | Trinity            | Sequencing        | 7.2              | 28.2          | 33.6 (19.0 – 59.0)          | 0.0                   |
| Ley_et_al_2021 (35)          | Bangladesh    | Clinical trial, cross-sectional and case-control | 1680        | 362              | Randox             | Sequencing        | 7.0              | 48.6          | 33.5 (6.0 - 80.0)           | 0.0                   |
| Pal_et_al_2021 (36)          | United States | Cross-sectional, assay evaluation                | 790         | 35               | Pointe Scientific  | Sequencing        | -                | 44.4          | -                           | 0.0                   |
| Reading_et_al_2016 (37)      | Palestine     | Health-facility based                            | 131         | 79               | Randox             | PCR               | 8.7 <sup>b</sup> | 90.3          | 2.5 (0.9 – 5.1)             | -                     |
| Roca-Feltrer_et_al_2014 (38) | Cambodia      | Cross-sectional, assay evaluation                | 938         | 125              | Trinity            | Sequencing        | 12               | 47.2          | 32.9 (6.0 – 75.0)           | -                     |
| Roh_et_al_2016 (39)          | Uganda        | Cross-sectional, assay evaluation                | 631         | 625              | Trinity            | PCR               | 7.9              | 50.9          | 2.4 (0.2 – 5.0)             | 4.0                   |
| Satyagraha_et_al_2015 (40)   | Indonesia     | Cross-sectional                                  | 2033        | 70               | Trinity            | Sequencing        | 9.9              | 57.7          | 33.1 (6 - 70)               | 0.02                  |
| Satyagraha_et_al_2016 (41)   | Indonesia     | Cross-sectional, assay evaluation                | 610         | 44               | Trinity            | PCR+ Sequencing   | 9.2              | 54.6          | 27.8 (6 - 70)               | 0.02                  |

|                            |           |                       |      |     |                   |                                   |                   |      |               |      |
|----------------------------|-----------|-----------------------|------|-----|-------------------|-----------------------------------|-------------------|------|---------------|------|
| Satyagraha_et_al_2021 (42) | Indonesia | Cross-sectional       | 1928 | 367 | Trinity           | PCR+ Sequencing                   | 11.0              | 0.0  | 23.7 (6 - 70) | 0.07 |
| Xia_et_al_2016 (43)        | China     | Health-facility based | 763  | 730 | Zhongshan Biotech | Multicolor melting curve analysis | 1.58 <sup>c</sup> | 58.4 | 8.4 (0 - 64)  | 0.0  |

\*indicates % of included data from each study, not of entire study sample ;<sup>a</sup>data only available in units of U/10<sup>12</sup> RBC, <sup>b</sup>represents mean of 22 G6PD normal males, <sup>c</sup>in units of G6PD/6PGD ratio

**Note:** ‘-’ indicates data unavailable
